# Supplementary material for: Bamboo as a Cost-Effective Source of Renewable Carbon for Sustainable Economic Development in Low- and Middle-Income Economies
Source: MDPI journal article supplement (doi:10.3390/en16010331), 2022-12-28
Supplement: s1 [file s1]

Archive with 1 entries (1 files):
- energies-2076559-supplementary.pdf
